# Supplementary material
Source: MDPI journal article supplement (https://www.mdpi.com/2073-4395/13/1/101)
Supplement: s1 [file s1]

## Dissecting the genotype × environment interaction for potato tuber yield and components

**Table S1.** *F* values of main effects and their interactions resulting from three-way analysis of variance (ANOVA) of potato yield and yield-related traits.

| Source          | df | MY                    | UT                   | NMTP                  | AMTW                  | TSG                  | CT < 40 mm            | CT 40–60 mm          | CT > 60 mm           |
|-----------------|----|-----------------------|----------------------|-----------------------|-----------------------|----------------------|-----------------------|----------------------|----------------------|
| Blocks          | 2  | 1.03 <sup>ns</sup>    | 1.03 <sup>ns</sup>   | 2.70 <sup>ns</sup>    | 1.04 <sup>ns</sup>    | 1.82 <sup>ns</sup>   | 1.16 <sup>ns</sup>    | 4.23 <sup>*</sup>    | 2.75 <sup>ns</sup>   |
| Location (L)    | 2  | 5.06 <sup>**</sup>    | 22.78 <sup>***</sup> | 16.38 <sup>***</sup>  | 55.00 <sup>***</sup>  | 19.30 <sup>***</sup> | 43.97 <sup>***</sup>  | 35.16 <sup>***</sup> | 21.75 <sup>***</sup> |
| Year (Y)        | 3  | 189.03 <sup>***</sup> | 5.39 <sup>**</sup>   | 204.42 <sup>***</sup> | 117.93 <sup>***</sup> | 46.87 <sup>***</sup> | 121.83 <sup>***</sup> | 82.81 <sup>***</sup> | 42.56 <sup>**</sup>  |
| Genotype (G)    | 4  | 41.08 <sup>***</sup>  | 9.97 <sup>**</sup>   | 5.09 <sup>**</sup>    | 49.35 <sup>***</sup>  | 85.11 <sup>***</sup> | 57.45 <sup>***</sup>  | 5.84 <sup>**</sup>   | 70.41 <sup>***</sup> |
| (L) × (Y)       | 6  | 32.05 <sup>***</sup>  | 8.42 <sup>**</sup>   | 23.77 <sup>***</sup>  | 52.16 <sup>***</sup>  | 2.49 <sup>*</sup>    | 28.04 <sup>**</sup>   | 11.98 <sup>**</sup>  | 34.57 <sup>***</sup> |
| (L) × (G)       | 8  | 23.09 <sup>***</sup>  | 5.50 <sup>**</sup>   | 4.43 <sup>**</sup>    | 8.23 <sup>**</sup>    | 5.44 <sup>***</sup>  | 3.00 <sup>**</sup>    | 10.78 <sup>**</sup>  | 8.67 <sup>***</sup>  |
| (Y) × (G)       | 12 | 21.41 <sup>***</sup>  | 4.10 <sup>**</sup>   | 4.87 <sup>**</sup>    | 5.89 <sup>**</sup>    | 3.84 <sup>***</sup>  | 11.10 <sup>**</sup>   | 3.50 <sup>***</sup>  | 6.34 <sup>***</sup>  |
| (L) × (Y) × (G) | 23 | 14.89 <sup>***</sup>  | 6.16 <sup>***</sup>  | 3.50 <sup>**</sup>    | 8.03 <sup>**</sup>    | 4.90 <sup>***</sup>  | 4.92 <sup>**</sup>    | 6.02 <sup>***</sup>  | 9.55 <sup>***</sup>  |
| CV (%)          |    | 9.37                  | 45.19                | 14.39                 | 10.20                 | 0.37                 | 22.45                 | 6.91                 | 24.32                |

Values are given as *F* of Fisher; df = degrees of freedom; \*\*\*, \*\* and \* indicate significant at  $p < 0.001$ ,  $p < 0.01$  and  $p < 0.05$ , respectively, and <sup>ns</sup>, not significant.

MY: marketable yield; UT: unmarketable tubers; NMTP: number of marketable tubers plant<sup>-1</sup>; AMTW: average marketable tuber weight; TSG: tuber specific gravity; CT: calibre tubers.

**Table S2.** IPC1 and IPC2 scores derived from AMMI analysis of the 5 potato genotypes and 12 environments under study.

|     | MY      |         | UT      |         | NMTP        |         |
|-----|---------|---------|---------|---------|-------------|---------|
|     | IPC1    | IPC2    | IPC1    | IPC2    | IPC1        | IPC2    |
| G1  | -0.4780 | -1.8771 | -0.3716 | 1.1494  | -1.0524     | 0.3942  |
| G2  | 4.3870  | 1.9072  | 0.0391  | 1.5943  | -0.8683     | 1.0011  |
| G3  | -0.0022 | -0.1790 | -2.3028 | 0.3360  | 0.0944      | -0.5809 |
| G4  | 0.7121  | 0.7217  | -0.9948 | -2.6634 | -0.4689     | -0.2096 |
| G5  | -4.6191 | 2.4274  | 3.6301  | -0.4163 | 1.9952      | 0.5552  |
| E1  | -0.8515 | -1.2301 | -2.0402 | -0.5796 | -0.3454     | -0.5601 |
| E2  | -0.7875 | -0.9922 | 0.5613  | -2.0243 | 0.3387      | 0.4272  |
| E3  | 1.5780  | -2.3283 | 3.2907  | 0.7669  | -1.4834     | 0.9154  |
| E4  | 0.2657  | 1.3447  | -0.1681 | -0.7129 | 0.3290      | 0.2166  |
| E5  | 1.1335  | -0.8468 | 0.3256  | 0.4354  | -0.6399     | -1.3203 |
| E6  | -0.8034 | 1.3255  | -1.1681 | 0.7743  | -0.0720     | -0.4538 |
| E7  | -1.3200 | 1.1051  | -0.4188 | 0.5951  | 1.2394      | 0.3908  |
| E8  | -3.6066 | 1.2364  | -1.3530 | 1.6824  | 1.0435      | -0.2571 |
| E9  | -0.6702 | -2.7106 | 0.6673  | 0.7352  | -0.2617     | 0.1715  |
| E10 | -0.1037 | 0.6180  | 0.4549  | -0.1645 | 0.1313      | 0.0781  |
| E11 | 2.9198  | -0.7755 | -0.3355 | -0.8855 | -0.4336     | 0.2904  |
| E12 | 3.2461  | 3.2538  | 0.1839  | -0.6225 | 0.1540      | 0.1014  |
|     | AMTW    |         | TSG     |         | CT 40–60 mm |         |
|     | IPC1    | IPC2    | IPC1    | IPC2    | IPC1        | IPC2    |
| G1  | -7.6064 | -1.8699 | -1.7956 | 0.3657  | -2.2319     | 2.0865  |
| G2  | 4.4574  | -4.6008 | 1.3904  | 2.0834  | -0.1853     | -2.2758 |
| G3  | -4.1127 | -1.4650 | -0.8259 | -0.4305 | -2.2694     | 0.7675  |
| G4  | 2.3599  | -0.1390 | -2.7113 | 0.8936  | 0.6642      | -2.4724 |
| G5  | -1.4595 | 0.1447  | 3.0906  | 0.0879  | 4.0224      | 1.8941  |
| E1  | -2.6053 | 1.2478  | -1.0723 | 0.3680  | 2.3816      | -1.6799 |
| E2  | -4.3718 | -3.1247 | -1.6652 | -0.0292 | -1.5437     | 0.5578  |
| E3  | -0.5414 | 1.6677  | -0.7539 | 1.7744  | -0.3113     | -0.0715 |
| E4  | 0.4721  | -0.5693 | -0.5761 | -0.4247 | -1.5473     | -0.3606 |
| E5  | 0.0657  | 1.2118  | -0.0794 | 0.9660  | -2.2331     | 0.4616  |
| E6  | 3.1530  | 4.4031  | -0.3617 | 0.0455  | -0.6351     | 0.3492  |
| E7  | 0.6642  | -1.7859 | 3.0090  | 0.0210  | 0.0706      | -1.5149 |
| E8  | -1.0601 | 2.4596  | -0.2645 | 0.2605  | -1.4326     | -1.0055 |
| E9  | -2.0298 | 1.1686  | -0.9572 | -1.2068 | 0.6052      | 0.0441  |
| E10 | 0.5895  | 0.1389  | 1.9425  | -2.1399 | 2.4266      | -0.1106 |
| E11 | -0.8171 | -3.7089 | -0.8322 | -1.6172 | 0.9148      | -0.2522 |
| E12 | 6.4809  | -3.1088 | 1.6109  | 1.9823  | 1.3044      | 3.5826  |

Notes: MY: marketable yield; UT: unmarketable tubers; NMTP: number of marketable tubers plant<sup>-1</sup>; AMTW: average marketable tuber weight; TSG: tuber specific gravity; CT: calibre tubers.

**Table S3.** PC1 and PC2 scores derived from GGE analysis of the 5 potato genotypes and 12 environments under study.

|     | MY       |          | UT       |          | NMTP        |          |
|-----|----------|----------|----------|----------|-------------|----------|
|     | PC1      | PC2      | PC1      | PC2      | PC1         | PC2      |
| G1  | -6.5463  | 28.2662  | -2.6320  | 5.9194   | -2.8470     | 1.3854   |
| G2  | -33.9705 | -6.7596  | -1.2457  | 7.4698   | -2.0205     | 0.3176   |
| G3  | 13.8074  | -12.1439 | -8.7411  | -5.7860  | -0.0189     | 0.8505   |
| G4  | 0.2302   | -14.1337 | -4.5284  | -4.8294  | 0.0651      | -3.5560  |
| G5  | 26.4793  | 4.7710   | 17.1472  | -2.7737  | 4.8213      | 1.0026   |
| E1  | -0.0830  | 0.3419   | -0.3771  | -0.3940  | -0.2046     | 0.1700   |
| E2  | -0.0563  | 0.2822   | 0.2039   | -0.5816  | 0.0787      | 0.3326   |
| E3  | -0.3695  | 0.2946   | 0.7886   | 0.0448   | -0.6728     | 0.4540   |
| E4  | -0.2376  | 0.1031   | 0.0351   | -0.3312  | 0.0795      | 0.2435   |
| E5  | -0.1861  | -0.1690  | 0.1338   | -0.0937  | -0.2807     | -0.4528  |
| E6  | 0.0173   | -0.1511  | -0.1894  | -0.1609  | -0.0617     | -0.1488  |
| E7  | -0.0382  | 0.0234   | -0.0280  | -0.1024  | 0.4530      | 0.2658   |
| E8  | 0.3076   | 0.0233   | -0.2536  | 0.1646   | 0.3554      | 0.3316   |
| E9  | -0.0540  | 0.3639   | 0.2067   | -0.0124  | -0.1799     | 0.4045   |
| E10 | -0.0237  | 0.1264   | 0.1578   | -0.1289  | 0.0099      | 0.0906   |
| E11 | -0.6737  | 0.2701   | 0.0179   | -0.5530  | -0.2146     | 0.0471   |
| E12 | -0.4562  | -0.6141  | 0.0791   | 0.0004   | 0.0183      | 0.1154   |
|     | AMTW     |          | TSG      |          | CT 40–60 mm |          |
|     | PC1      | PC2      | PC1      | PC2      | PC1         | PC2      |
| G1  | -1.4614  | -73.4821 | -17.2352 | 6.8425   | -10.6486    | 7.9367   |
| G2  | 80.3824  | 21.6201  | 8.8943   | -6.6518  | -1.5527     | -8.4690  |
| G3  | -78.4322 | 27.8449  | 34.4425  | 4.7227   | -13.5105    | 3.9061   |
| G4  | 25.6059  | 18.6728  | -14.9341 | 10.7365  | 5.2337      | -12.6752 |
| G5  | -26.0947 | 5.3444   | -11.1675 | -15.6499 | 20.4780     | 9.3015   |
| E1  | 0.1436   | -0.2826  | 0.2092   | 0.2218   | 0.4003      | -0.3326  |
| E2  | 0.2508   | -0.5580  | 0.2259   | 0.3713   | -0.3746     | 0.1872   |
| E3  | -0.0157  | 0.0180   | 0.0645   | 0.0744   | -0.1176     | 0.0160   |
| E4  | 0.3108   | -0.0164  | 0.3078   | 0.1666   | -0.3353     | -0.1175  |
| E5  | 0.1466   | 0.0204   | 0.1747   | -0.0165  | -0.4663     | 0.0843   |
| E6  | 0.1463   | 0.3999   | 0.2872   | 0.1021   | -0.1869     | 0.1320   |
| E7  | 0.2756   | 0.0201   | 0.2573   | -0.6438  | -0.0369     | -0.2910  |
| E8  | 0.1534   | -0.1022  | 0.2907   | 0.0837   | -0.3496     | -0.1522  |
| E9  | 0.0656   | -0.1813  | 0.3407   | 0.2753   | 0.0532      | 0.0682   |
| E10 | 0.4671   | -0.0518  | 0.4873   | -0.2876  | 0.3863      | 0.0641   |
| E11 | 0.4660   | -0.2451  | 0.3208   | 0.2482   | 0.1263      | -0.0419  |
| E12 | 0.4874   | 0.5843   | 0.2936   | -0.3568  | 0.1709      | 0.8351   |

Notes: MY: marketable yield; UT: unmarketable tubers; NMTP: number of marketable tubers plant<sup>-1</sup>; AMTW: average marketable tuber weight; TSG: tuber specific gravity; CT: calibre tubers.
